# Supplementary material for: Dental procedures, antibiotic prophylaxis, and endocarditis among people with prosthetic heart valves: nationwide population based cohort and a case crossover study
Source: PubMed Central journal article supplement — BMJ. 2017 Sep 7;358:j3776. doi: 10.1136/bmj.j3776 (PMC5588045; doi:10.1136/bmj.j3776), 2017-09-07
Supplement: tubs038798.ww1.pdf [file tubs038798.ww1.pdf]

## Supplementary Material - RESULTS

**Figure S1.** Flow chart of the case-crossover study, 2009-2014

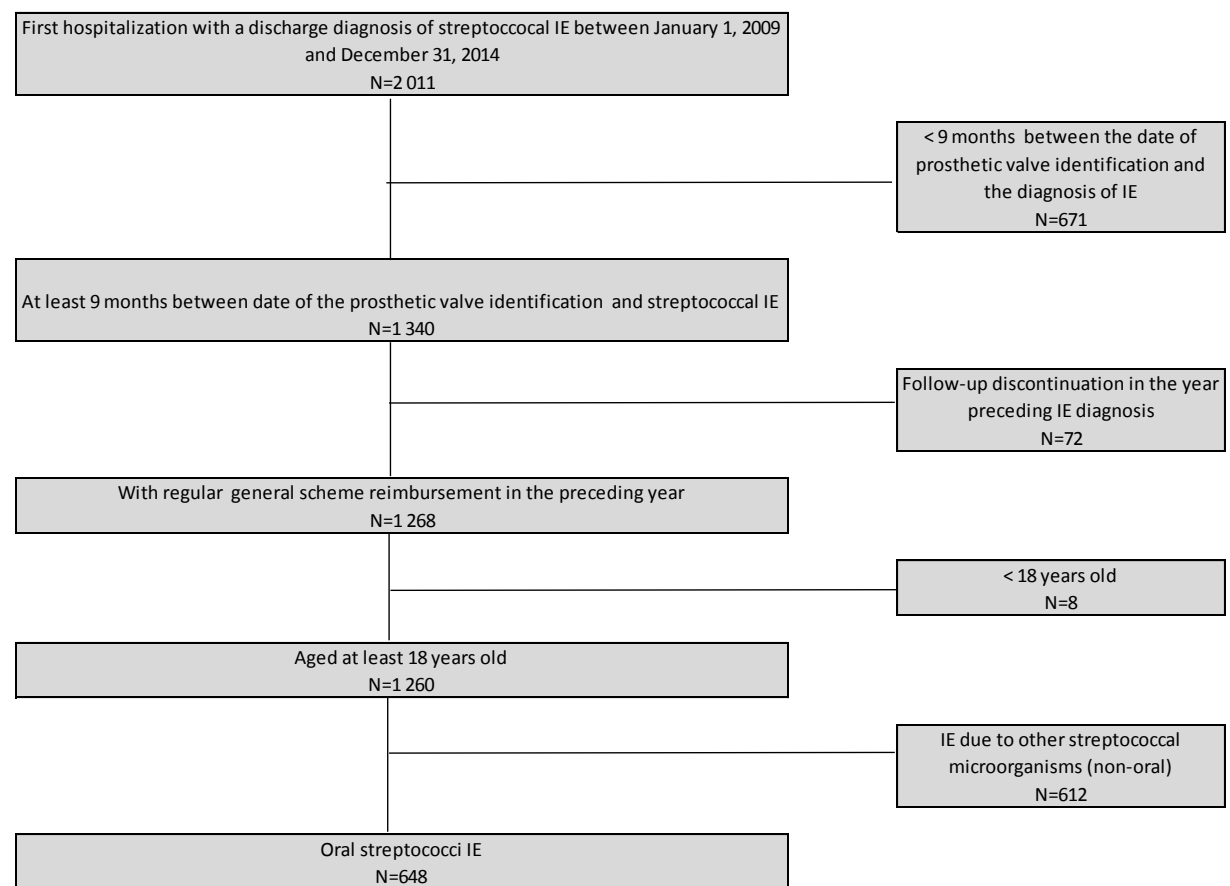

**Figure S2.** Frequency of patients undergoing dental procedures exposure within the 20 months preceding oral streptococcal IE of the 648 patients included in the case-crossover study, 2009 -2014

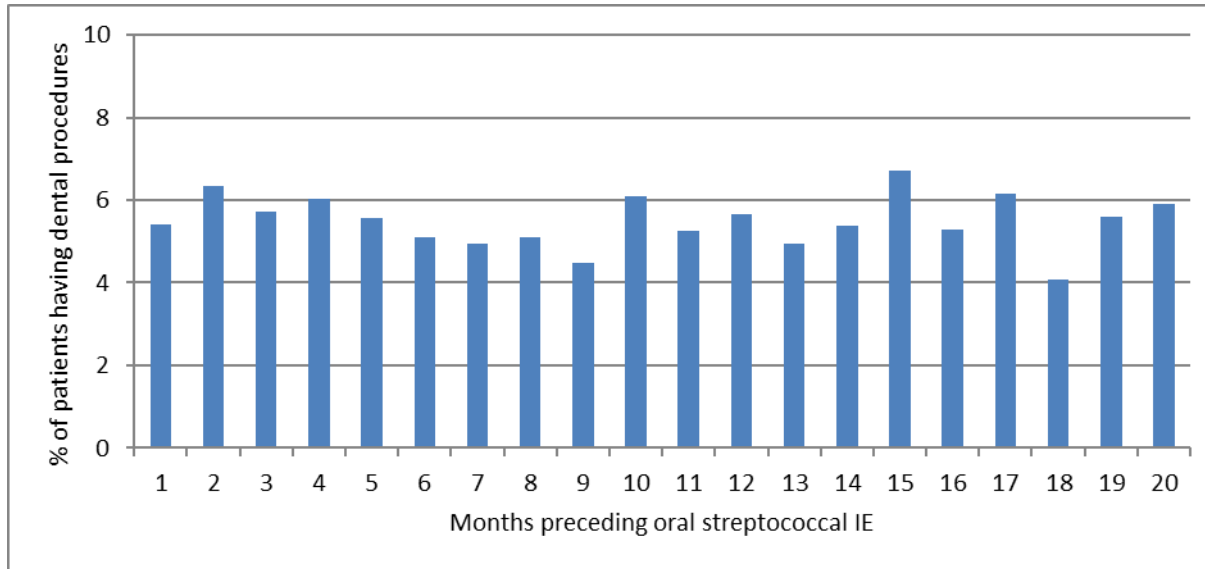

**Table S1.** Concordant and Discordant Pairs of Exposures to dental procedures in the 648 Patients With oral streptococcal IE Infective Endocarditis included in the Case-crossover study, 2009 to 2014

*a) 2 categories of exposure classification*

|             |                                | Control period M7-9, M13-15, M19-21 (N=1737) |                            |                                   |
|-------------|--------------------------------|----------------------------------------------|----------------------------|-----------------------------------|
|             |                                | Non exposition                               | Invasive dental procedures | Non<br>Invasive dental procedures |
| Case period | Non exposure                   | 1307                                         | 42                         | 128                               |
|             | Invasive dental procedures     | 69                                           | 5                          | 15                                |
|             | Non Invasive dental procedures | 131                                          | 8                          | 32                                |

**b) 4 categories of exposure classification**

|             |                                | Control period M7-9, M13-15, M19-21 (N=1737) |                                |         |                            |         |   |
|-------------|--------------------------------|----------------------------------------------|--------------------------------|---------|----------------------------|---------|---|
|             |                                | Non exposure                                 | Non-invasive dental procedures |         | Invasive dental procedures |         |   |
|             |                                |                                              | without AP                     | with AP | without AP                 | with AP |   |
| Case period | Non exposure                   | 1307                                         | 106                            | 22      | 17                         | 25      |   |
|             | Non-invasive dental procedures | without AP                                   | 109                            | 23      | 5                          | 4       | 4 |
|             |                                | with AP                                      | 22                             | 3       | 1                          | 0       | 0 |
|             | Invasive dental procedures     | without AP                                   | 31                             | 2       | 1                          | 4       | 1 |
|             |                                | with AP                                      | 38                             | 10      | 2                          | 0       | 0 |

AP : Antibiotic Prophylaxis
