# Supplementary material for: Dental procedures, antibiotic prophylaxis, and endocarditis among people with prosthetic heart valves: nationwide population based cohort and a case crossover study
Source: PubMed Central journal article supplement — BMJ. 2017 Sep 7;358:j3776. doi: 10.1136/bmj.j3776 (PMC5588045; doi:10.1136/bmj.j3776), 2017-09-07
Supplement: tubs038798.ww2.pdf [file tubs038798.ww2.pdf]

## Supplementary material - METHODS

### *Identification of individuals with prosthetic heart valves and constitution of the study-population*

Specific medical procedure codes for prosthetic valve positioning or replacement

|         |                                                                                                                                                          |
|---------|----------------------------------------------------------------------------------------------------------------------------------------------------------|
| DBKA004 | Replacement of right atrioventricular valve by a stented bioprosthesis or a mechanical prosthesis, by thoracotomy under cardiopulmonary bypass           |
| DBKA008 | Replacement of right atrioventricular valve by a homograft, by thoracotomy under cardiopulmonary bypass                                                  |
| DBKA007 | Replacement of pulmonary valve by a stented bioprosthesis or a mechanical prosthesis, by thoracotomy under cardiopulmonary bypass                        |
| DBKA012 | Replacement of pulmonary valve by a homograft or a bioprosthesis, by thoracotomy under cardiopulmonary bypass                                            |
| DBKA010 | Replacement of left atrioventricular valve by a stented bioprosthesis or a mechanical prosthesis, by thoracotomy under cardiopulmonary bypass            |
| DBKA005 | Replacement of left atrioventricular valve by a homograft, by thoracotomy under cardiopulmonary bypass                                                   |
| DBKA002 | Replacement of left atrioventricular valve by a prosthesis inserted in non-anatomical position, by thoracotomy under cardiopulmonary bypass              |
| DBKA006 | Replacement of aortic valve by a stented bioprosthesis or a mechanical prosthesis, by thoracotomy under cardiopulmonary bypass                           |
| DBKA003 | Replacement of aortic valve by a stentless bioprosthesis, by thoracotomy under cardiopulmonary bypass                                                    |
| DBKA001 | Replacement of aortic valve by a homograft, by thoracotomy under cardiopulmonary bypass                                                                  |
| DBKA011 | Replacement of aortic valve by a prosthesis inserted in non-anatomical position, by thoracotomy under cardiopulmonary bypass                             |
| DBKA009 | Replacement of aortic and left atrioventricular valve by a stented bioprosthesis or a mechanical prosthesis, by thoracotomy under cardiopulmonary bypass |

|         |                                                                                                                                                                                                 |
|---------|-------------------------------------------------------------------------------------------------------------------------------------------------------------------------------------------------|
| DBMA013 | Left atriventricular annular reconstruction with valve replacement by a stented bioprosthesis or a mechanical prosthesis, by thoracotomy under cardiopulmonary bypass                           |
| DBMA005 | Left atriventricular annular reconstruction with valve replacement by a homograft, by thoracotomy under cardiopulmonary bypass                                                                  |
| DBMA009 | Aortic annular reconstruction with valve replacement by a stented bioprosthesis or a mechanical prosthesis, by thoracotomy under cardiopulmonary bypass                                         |
| DBMA010 | Aortic annular reconstruction with valve replacement by a homograft, by thoracotomy under cardiopulmonary bypass                                                                                |
| DBMA006 | Aortic annular reconstruction and valve replacement by a stentless bioprosthesis, by thoracotomy under cardiopulmonary bypass                                                                   |
| DBMA001 | Reconstruction of left ventricular outflow tract with right anterior enlargement of aortic annulus and valve replacement, by thoracotomy under cardiopulmonary bypass                           |
| DBMA015 | Reconstruction of left ventricular outflow tract with left anterior enlargement of aortic annulus and opening of pulmonary outflow tract, by thoracotomy under cardiopulmonary bypass           |
| DBMA004 | Reconstruction of left ventricular outflow tract with transfer of pulmonary valve in aortic position and reconstruction of pulmonary outflow tract, by thoracotomy under cardiopulmonary bypass |
| DBLF009 | Transcatheter implantation of a pulmonary bioprosthesis in a prosthetic conduit                                                                                                                 |
| DBLF001 | Transcatheter trans arterial implantation of an aortic bioprosthesis                                                                                                                            |
| DBLA004 | Transcatheter transapical implantation of an aortic bioprosthesis without cardiopulmonary bypass                                                                                                |
| DBSF001 | Transcatheter closure of a paraprostheses dehiscence                                                                                                                                            |
| DBEA001 | Reinsertion of a valve prosthesis, by thoracotomy under cardiopulmonary bypass                                                                                                                  |
| DGKA011 | Replacement of ascending aorta with replacement of aortic valve without coronary artery reimplantation, by thoracotomy under cardiopulmonary bypass                                             |
| DGKA015 | Replacement of ascending aorta with replacement of aortic valve with coronary artery                                                                                                            |

reimplantation, by thoracotomy under cardiopulmonary bypass

DGKA018 Replacement of ascending and horizontal aorta without replacement of aortic valve without coronary artery reimplantation, by thoracotomy under cardiopulmonary bypass

DGKA014 Replacement of ascending and horizontal aorta with replacement of aortic valve without coronary artery reimplantation, by thoracotomy under cardiopulmonary bypass

### *Definition of exposure*

#### *Identification of invasive dental procedures*

|                          |         |
|--------------------------|---------|
| Scaling and root planing | HBJD001 |
| Teeth extraction         | HBGD035 |
|                          | HBGD037 |
|                          | HBGD309 |
|                          | HBGD284 |
|                          | HBGD065 |
|                          | HBGD462 |
|                          | HBGD464 |
|                          | HBGD263 |
|                          | HBGD280 |
|                          | HBGD093 |
|                          | HBGD362 |
|                          | HBGD054 |
|                          | HBGD111 |
|                          | HBGD174 |
|                          | HBGD057 |
|                          | HBGD133 |
|                          | HBGD123 |
|                          | HBGD468 |
|                          | HBGD282 |

HBGD201  
HBGD042  
HBGD026  
HBGD036  
HBGD043  
HBGD319  
HBGD489  
HBGD497  
HBGD106  
HBGD076  
HBGD422  
HBGD420  
HBGD064  
HBGD356  
HBGD146  
HBGD382  
HBGD247  
HBGD197  
HBGD333  
HBGD261  
HBGD499  
HBGD461  
HBGD278  
HBGD258  
HBGD311  
HBGD235  
HBGD374  
HBGD475  
HBGD285  
HBGD338  
HBGD193  
HBGD345  
HBGD414

HBGD245  
HBGD283  
HBGD022  
HBGD034  
HBGD287  
HBGD031  
HBGD032  
HBGD039  
HBGD002  
HBGD028  
HBGD014  
HBGD015  
HBGD459  
HBGD386  
HBGD047  
HBGD018  
HBGD004  
HBGD025  
HBGD021  
HBGD038  
HBGD044  
HBGD003  
HBGD016  
HBGD017  
HBFD014  
HBGD040

Excision of a cervicofacial cellulitis /periodontal abscess

LCJA004  
LCJA002  
LCJA003  
HAJA002  
HAJD004  
HBJB001

Treatment of teeth with vital pulp

HBFD017

HBFD033

HBFD021

HBFD035

HBFD019

HBFD008

HBFD006

HBFD032

Treatment of teeth with necrotic pulp

HBFD015

HBFD458

HBFD001

HBFD395

HBFD326

HBFD297

HBFD003

HBFD474

HBFD150

HBFD024

Inlay-core

HBLD007

HBLD261

Dental splint

HBLD052

HBLD050

HBLD053

HBLD051

Peridontal surgery

HBFA005

HBFA004

HBFA003

HBMA001

HBFA006

HBFA007

HBFA008

***Antibiotic prophylaxis***

ATC codes for effective antibiotic treatment

J01CA04

J01CR02

J01CA01

J01CR01

J01CE30

J01FA10

J01DF01

J01CA06

J01CE08

J01CE01

J01DC04

J01DB05

J01DB01

J01DB08

J01DB07

J01DB04

J01DE01

J01DD08

J01DC07

J01DD13

J01DB09

J01DD02

J01DD04

J01DC02

J01FA09

J01FF01

J01XX03  
J01CF02  
J01CF01  
J01FA13  
J01AA02  
J01FA01  
J01XC01  
J01DH51  
J01FA07  
J01MA12  
J01AA04  
J01DH02  
J01AA05  
J01CA14  
J01FA03  
J01AA08  
J01MA14  
J01CE02  
J01CR05  
J01CA02  
J01FG01  
J01MB01  
J01FA06  
J01GB08  
J01MA09  
J01FA02  
J01RA04  
J01EE01  
J01CR04  
J01FA15  
J01AA07  
J01BA02  
J01BA52  
J01CA13  
J01CR03



*Confounding variables*

**Specific medical procedure codes for implantable cardioverter defibrillator (ICD) or pacemaker (PM)**

Cardiac pacemaker implantation

DELF007  
DELF001  
DELF904  
DELF010  
DELF005  
DELF902  
DELF015  
DELF905  
DELF903  
DELF901  
DELF012  
DELA003  
DELA001

Cardioverter defibrillator implantation

DELF013  
DELF020  
DELF014  
DELF016  
DELF900  
DELA004

Pacemaker or cardioverter defibrillator lead repositioning and Pacemaker or Cardioverter defibrillator generator repositioning

DEEF001  
DEEF002

DEEA001

Extraction or Implantation of an additional pacemaker or cardioverter defibrillator lead

DEGF004

DEGF001

DEGF002

DEGF003

DEGF006

DEGF005

DEGA002

DELF017

DELF019

DELF018

Implantation, extraction, or replacement of pacemaker or cardioverter defibrillator generator

DELA006

DELA007

DEGA003

DEKA001

DEKA002

Testing and checking of pacemaker or cardioverter defibrillator generator

DEMP002

DEMP001

DERP001

## **Identification of dialysis dependency**

Blotière PO, Tuppin P, Weill A, Ricordeau P, Allemand H. The cost of dialysis and kidney transplantation in France in 2007, impact of an increase of peritoneal dialysis and transplantation. *Nephrol Ther.* 2010 Jul;6(4):240-7

## **Identification of diabete**

### **ICD-10 codes**

E10

E11

E12

E13

E14

G59.0

G63.2

G73.0

G99.0

H28.0

H36.0

I79.2

L97

M14.2

M14.6

N08.3

### **ATC codes for antidiabetic drug use**

A10AB01

A10AB03

A10AB04

A10AB05

A10AB06

A10AC01

A10AC03

A10AC04

A10AD01

A10AD03

A10AD04

A10AD05

A10AE01

A10AE02

A10AE03

A10AE04

A10AE05

A10AE30

A10BA02

A10BB01  
A10BB03  
A10BB04  
A10BB06  
A10BB07  
A10BB09  
A10BB12  
A10BD02  
A10BD03  
A10BD05  
A10BD07  
A10BD08  
A10BD10  
A10BD15  
A10BD16  
A10BF01  
A10BF02  
A10BG02  
A10BG03  
A10BH01  
A10BH02  
A10BH03  
A10BX02  
A10BX04  
A10BX07  
A10BX09  
A10BX10  
A10BX11  
A10BX12  
A10BX14

#### **Identification of Intravenous drug use**

##### **ICD-10 codes**

F11  
F14

##### **ATC codes**

N07BC01  
N07BC02  
N07BB04  
N07BC51
